# Supplementary material for: Intensive Rehabilitation Program in Older Adults with Stroke: Therapy Content and Feasibility—Preliminary Results from the BRAIN-CONNECTS Study
Source: MDPI journal article supplement (doi:10.3390/ijerph20064696), 2023-03-07
Supplement: s1 [file s1]

Supplementary Material. Table S1: Data collection Notebook

PHYSICAL THERAPY Data Collection

Patient's name: ID: Rehabilitation Start Date: Patient's n°:

| PHYSICAL THERAPY                      |                                                              | Session n°          | Session n° | Session n° | Session n° | Session n° |
|---------------------------------------|--------------------------------------------------------------|---------------------|------------|------------|------------|------------|
|                                       |                                                              | Date                |            |            |            |            |
|                                       |                                                              | Morning / Afternoon |            |            |            |            |
|                                       |                                                              | Therapist's name    |            |            |            |            |
| Activities                            | Passive mobilizations of affected extremities.               | Time                | Time       | Time       | Time       | Time       |
|                                       | Auto-Assisted exercises of affected extremities.             | Time                | Time       | Time       | Time       | Time       |
|                                       | Active exercises of affected extremities.                    | Time                | Time       | Time       | Time       | Time       |
|                                       | Balance training and stepping.                               | Time                | Time       | Time       | Time       | Time       |
|                                       | Trunk control training.                                      | Time                | Time       | Time       | Time       | Time       |
|                                       | Body-weight supported treadmill training.                    | Time                | Time       | Time       | Time       | Time       |
|                                       | Standing training – Standing frame.                          | Time                | Time       | Time       | Time       | Time       |
|                                       | Stairs, ramps and obstacles.                                 | Time                | Time       | Time       | Time       | Time       |
|                                       | Gait training.                                               | Time                | Time       | Time       | Time       | Time       |
|                                       | Transfer training.                                           | Time                | Time       | Time       | Time       | Time       |
|                                       | Aerobic training.                                            | Time                | Time       | Time       | Time       | Time       |
|                                       | Coordination and integration exercises of the affected side. | Time                | Time       | Time       | Time       | Time       |
| Total time/day                        |                                                              |                     |            |            |            |            |
| Not attendance? – Reason              |                                                              |                     |            |            |            |            |
| Early termination? – Reason           |                                                              |                     |            |            |            |            |
| Comment/adverse events during session |                                                              |                     |            |            |            |            |

## OCUPATIONAL THERAPY Data Collection

Patient's name: \_\_\_\_\_ ID: \_\_\_\_\_ Rehabilitation Start Date: \_\_\_\_ / \_\_\_\_ / \_\_\_\_ Patient's n°: \_\_\_\_\_

| OCUPATIONAL THERAPY                   |                                                                     | Session n° ____     | Session n° ____ | Session n° ____ | Session n° ____ | Session n° ____ |
|---------------------------------------|---------------------------------------------------------------------|---------------------|-----------------|-----------------|-----------------|-----------------|
|                                       |                                                                     | Date                |                 |                 |                 |                 |
|                                       |                                                                     | Morning / Afternoon |                 |                 |                 |                 |
|                                       |                                                                     | Therapist's name    |                 |                 |                 |                 |
| <b>Activities</b>                     | Upper Limb movement patterns, coordination, and dexterity training. | <i>Time</i>         | <i>Time</i>     | <i>Time</i>     | <i>Time</i>     | <i>Time</i>     |
|                                       | Task-specific training.                                             | <i>Time</i>         | <i>Time</i>     | <i>Time</i>     | <i>Time</i>     | <i>Time</i>     |
|                                       | Active-assisted tasks upper limb weight support.                    | <i>Time</i>         | <i>Time</i>     | <i>Time</i>     | <i>Time</i>     | <i>Time</i>     |
|                                       | Postural control and orthosis use for affected upper limb.          | <i>Time</i>         | <i>Time</i>     | <i>Time</i>     | <i>Time</i>     | <i>Time</i>     |
|                                       | Constraint Induced Movement Therapy (CIMT).                         | <i>Time</i>         | <i>Time</i>     | <i>Time</i>     | <i>Time</i>     | <i>Time</i>     |
|                                       | Mirror therapy.                                                     | <i>Time</i>         | <i>Time</i>     | <i>Time</i>     | <i>Time</i>     | <i>Time</i>     |
|                                       | Virtual reality for upper limb movement training.                   | <i>Time</i>         | <i>Time</i>     | <i>Time</i>     | <i>Time</i>     | <i>Time</i>     |
|                                       | Somatosensory rehabilitation.                                       | <i>Time</i>         | <i>Time</i>     | <i>Time</i>     | <i>Time</i>     | <i>Time</i>     |
|                                       | Cognitive and perceptual tasks.                                     | <i>Time</i>         | <i>Time</i>     | <i>Time</i>     | <i>Time</i>     | <i>Time</i>     |
|                                       | Activities of daily live training.                                  | <i>Time</i>         | <i>Time</i>     | <i>Time</i>     | <i>Time</i>     | <i>Time</i>     |
|                                       | Stroke education.                                                   | <i>Time</i>         | <i>Time</i>     | <i>Time</i>     | <i>Time</i>     | <i>Time</i>     |
| <b>Total time/day</b>                 |                                                                     |                     |                 |                 |                 |                 |
| Not attendance? – Reason              |                                                                     |                     |                 |                 |                 |                 |
| Early termination? – Reason           |                                                                     |                     |                 |                 |                 |                 |
| Comment/adverse events during session |                                                                     |                     |                 |                 |                 |                 |

## SPEECH THERAPY Data Collection

Patient's name: \_\_\_\_\_ ID: \_\_\_\_\_ Rehabilitation Start Date: \_\_\_\_/\_\_\_\_/\_\_\_\_ Patient's nº: \_\_\_\_\_

| SPEECH THERAPY                        |                                                                   | Session nº ____     | Session nº ____ | Session nº ____ | Session nº ____ | Session nº ____ |
|---------------------------------------|-------------------------------------------------------------------|---------------------|-----------------|-----------------|-----------------|-----------------|
|                                       |                                                                   | Date                |                 |                 |                 |                 |
|                                       |                                                                   | Morning / Afternoon |                 |                 |                 |                 |
|                                       |                                                                   | Therapist's name    |                 |                 |                 |                 |
| <b>Activities</b>                     | Verbal and written comprehension.                                 | <i>Time</i>         | <i>Time</i>     | <i>Time</i>     | <i>Time</i>     | <i>Time</i>     |
|                                       | Oral production (articulation, volume, tone and prosody).         | <i>Time</i>         | <i>Time</i>     | <i>Time</i>     | <i>Time</i>     | <i>Time</i>     |
|                                       | Phonological processing.                                          | <i>Time</i>         | <i>Time</i>     | <i>Time</i>     | <i>Time</i>     | <i>Time</i>     |
|                                       | Morphosyntax's exercises.                                         | <i>Time</i>         | <i>Time</i>     | <i>Time</i>     | <i>Time</i>     | <i>Time</i>     |
|                                       | Functional communication.                                         | <i>Time</i>         | <i>Time</i>     | <i>Time</i>     | <i>Time</i>     | <i>Time</i>     |
|                                       | Lexical evocation (free, phonetic phonological and semantic).     | <i>Time</i>         | <i>Time</i>     | <i>Time</i>     | <i>Time</i>     | <i>Time</i>     |
|                                       | Lingual praxis.                                                   | <i>Time</i>         | <i>Time</i>     | <i>Time</i>     | <i>Time</i>     | <i>Time</i>     |
|                                       | Cognition (memory, reasoning, logical reasoning and abstraction). | <i>Time</i>         | <i>Time</i>     | <i>Time</i>     | <i>Time</i>     | <i>Time</i>     |
|                                       | Respiratory Muscle Training (Orygen Dual Valve©).                 | <i>Time</i>         | <i>Time</i>     | <i>Time</i>     | <i>Time</i>     | <i>Time</i>     |
|                                       | Sensitive and gustatory stimulation.                              | <i>Time</i>         | <i>Time</i>     | <i>Time</i>     | <i>Time</i>     | <i>Time</i>     |
|                                       | Neuromuscular Electrical Stimulation (Vital Stym©).               | <i>Time</i>         | <i>Time</i>     | <i>Time</i>     | <i>Time</i>     | <i>Time</i>     |
| <b>Total time/day</b>                 |                                                                   |                     |                 |                 |                 |                 |
| Not attendance? – Reason              |                                                                   |                     |                 |                 |                 |                 |
| Early termination? – Reason           |                                                                   |                     |                 |                 |                 |                 |
| Comment/adverse events during session |                                                                   |                     |                 |                 |                 |                 |
